# Supplementary material
Source: ML conference proceedings conference paper supplement (https://openaccess.thecvf.com/content/WACV2022/html/Chen_Transfer_Learning_for_WACV_2022_paper.html)
Supplement: Supplementary file 1 [file Chen_Transfer_Learning_for_WACV_2022_supplemental.zip]

# Transfer Learning for Pose Estimation of Illustrated Characters

## Supplementary Materials

Shuhong Chen  
University of Maryland - College Park  
shuhong@cs.umd.edu

Matthias Zwicker  
University of Maryland - College Park  
zwicker@cs.umd.edu

### 1. Tagger Classification Comparison

In the main paper, we show that our tagger (trained on our new tag rulebook with class-balanced weighing) significantly improves transfer to pose estimation. Here, we show classification results in comparison to the RF5 Danbooru tagger [2], a publicly-available model with the same ResNet50 architecture. RF5 predicts the presence of the top 6000 most common tags in the dataset; 1207 of these are present in our new rulebook, and can be used to predict 1032 of the 1062 total new classes. As we can see from Table 1 below, our model performs much better at classifying the same tags.

| Model     | Ours   | RF5    |
|-----------|--------|--------|
| F-2       | 0.4744 | 0.2297 |
| precision | 0.3022 | 0.1238 |
| recall    | 0.5786 | 0.3360 |
| accuracy  | 0.9760 | 0.9496 |
| F-1       | 0.4249 | 0.1910 |
| precision | 0.4236 | 0.1898 |
| recall    | 0.4458 | 0.2235 |
| accuracy  | 0.9851 | 0.9727 |

Table 1. Comparison of our Danbooru tagger to RF5 [2]. Metrics are calculated using per-class optimal thresholds for either F-1 or F-2, and averaged across all classes shared between models. Note that this means F-1 and F-2 cannot be directly calculated from their respective precision and recall statistics in the table.

### 2. Pose Retrieval Additional Results

We display several more pose-based illustration retrieval results in Fig. 1; the images are taken from the Danbooru dataset [1]. The first two rows show challenging sitting positions, on which our model still performs well qualitatively. Despite the differences in orientation, our rotation-invariant descriptor is still able to identify the poses as similar. Rows 3-5 show some more standard poses. Notice that in row 4, the first and second neighbors are variations of the same character in the same pose; it is very common to find a set of such variations uploaded to Danbooru together, and our model may help identify them. In the last two rows, we show failure cases of our model, where incorrect predictions on the query result in neighbors with different poses.

We also provide artist attributions for the figures in the main paper and this supplementary document. Danbooru URLs are at <https://danbooru.donmai.us/posts/DANBOORU.ID>. Artist websites are tracked from the illustration’s Danbooru page to the best of our ability. Please note the links might not be SFW.

### References

- [1] Anonymous, Danbooru community, and Gwern Branwen. Danbooru2020: A large-scale crowdsourced and tagged anime illustration dataset. <https://www.gwern.net/Danbooru2020>, January 2021.
- [2] Matthew Baas. Danbooru2018 pretrained resnet models for pytorch. <https://rf5.github.io>, July 2019.

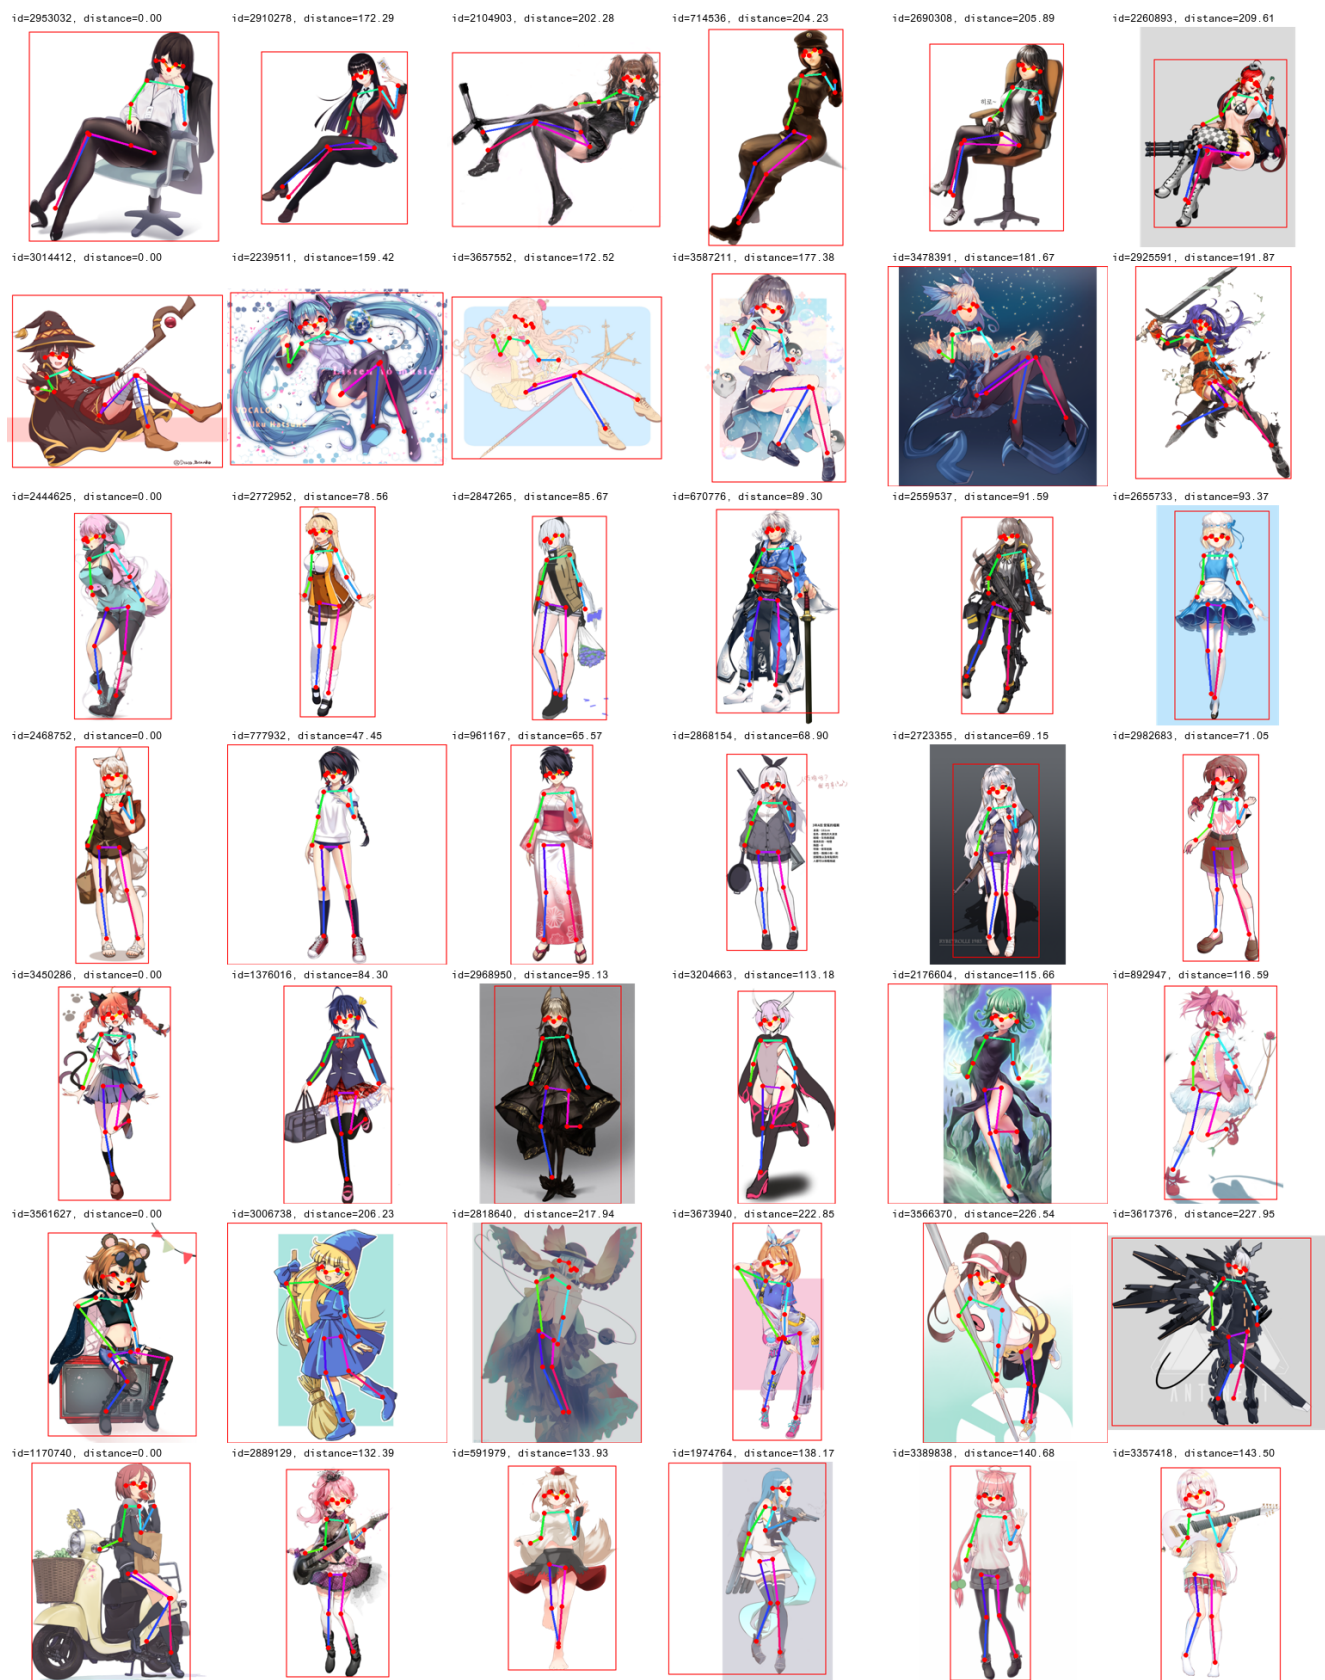

Figure 1. Additional pose-based retrieval results. From left to right, we show the query image (descriptor distance zero) followed by its five nearest neighbors (duplicate and NSFW images removed). Each illustration is annotated with its Danbooru ID, descriptor distance to the query, and the predicted bounding box with COCO keypoints.

| Row,Col | Danbooru ID | Artist Handle  | Artist URL                                                                                    |
|---------|-------------|----------------|-----------------------------------------------------------------------------------------------|
| 0,0     | 2467866     | 露茶             | <a href="https://www.pixiv.net/en/users/263905">https://www.pixiv.net/en/users/263905</a>     |
| 0,1     | 3550832     | Go-1           | <a href="https://twitter.com/go_1tk">https://twitter.com/go_1tk</a>                           |
| 0,2     | 2686368     | あれっくす          | <a href="https://twitter.com/alexmaster55">https://twitter.com/alexmaster55</a>               |
| 0,3     | 2690117     | クラモリ           | <a href="https://www.pixiv.net/en/users/1209275">https://www.pixiv.net/en/users/1209275</a>   |
| 0,4     | 2924224     | 紅葉(くれは)@お仕事募集中 | <a href="https://www.pixiv.net/en/users/6006540">https://www.pixiv.net/en/users/6006540</a>   |
| 0,5     | 3159104     | みの字            | <a href="https://www.pixiv.net/en/users/1523486">https://www.pixiv.net/en/users/1523486</a>   |
| 1,0     | 2407777     | 唯川             | <a href="https://twitter.com/yUikw">https://twitter.com/yUikw</a>                             |
| 1,1     | 3410315     | 楠本みや           | <a href="https://www.pixiv.net/en/users/6211628">https://www.pixiv.net/en/users/6211628</a>   |
| 1,2     | 2939081     | SeNMU          | <a href="https://www.pixiv.net/en/users/65308">https://www.pixiv.net/en/users/65308</a>       |
| 1,3     | 3561420     | なもり@ゆるゆり20巻でた  | <a href="https://twitter.com/_namori_">https://twitter.com/_namori_</a>                       |
| 1,4     | 1698324     | ratryu         | <a href="https://www.pixiv.net/en/users/3892817">https://www.pixiv.net/en/users/3892817</a>   |
| 1,5     | 3671428     | ほや野            | <a href="https://www.pixiv.net/en/users/1263092">https://www.pixiv.net/en/users/1263092</a>   |
| 2,0     | 3314044     | 九条だんぼ          | <a href="https://twitter.com/_Dan_ball">https://twitter.com/_Dan_ball</a>                     |
| 2,1     | 120497      | 劉祥             | <a href="https://www.pixiv.net/en/users/22017">https://www.pixiv.net/en/users/22017</a>       |
| 2,2     | 3669958     | もやし            | <a href="https://twitter.com/moyashi_mou2">https://twitter.com/moyashi_mou2</a>               |
| 2,3     | 2803142     | エノキドォ          | <a href="https://www.pixiv.net/en/users/4535430">https://www.pixiv.net/en/users/4535430</a>   |
| 2,4     | 114867      | なまもななせ・海通信     | <a href="https://www.pixiv.net/en/users/1167548">https://www.pixiv.net/en/users/1167548</a>   |
| 2,5     | 696477      | みぞれまじ          | <a href="https://www.pixiv.net/en/users/1502612">https://www.pixiv.net/en/users/1502612</a>   |
| 3,0     | 3509383     | 和菓子            | <a href="https://www.pixiv.net/en/users/13748172">https://www.pixiv.net/en/users/13748172</a> |
| 3,1     | 1803361     | アチャコ           | <a href="https://www.pixiv.net/en/users/1302618">https://www.pixiv.net/en/users/1302618</a>   |
| 3,2     | 2669609     | Seedkeng       | <a href="https://www.pixiv.net/en/users/11039166">https://www.pixiv.net/en/users/11039166</a> |
| 3,3     | 2997827     | 吉崎 観音          | <a href="https://twitter.com/yosRRX">https://twitter.com/yosRRX</a>                           |
| 3,4     | 3470661     | テイク            | <a href="https://www.pixiv.net/en/users/2096681">https://www.pixiv.net/en/users/2096681</a>   |
| 3,5     | 2975316     | いたたたた          | <a href="https://twitter.com/itatatata6">https://twitter.com/itatatata6</a>                   |

Table 2. Artist attribution for Figure 2 of the main paper.

| Row,Col | Danbooru ID | Artist Handle           | Artist URL                                                                                        |
|---------|-------------|-------------------------|---------------------------------------------------------------------------------------------------|
| 0,0     | 2953032     | Dev@プロフィールを確認!!         | <a href="https://www.pixiv.net/en/users/857300">https://www.pixiv.net/en/users/857300</a>         |
| 0,1     | 2910278     | shrimpえびちゃん             | <a href="https://www.pixiv.net/en/users/3989209">https://www.pixiv.net/en/users/3989209</a>       |
| 0,2     | 2104903     | 枚方ガルダイナ                 | <a href="https://twitter.com/hgd_AG">https://twitter.com/hgd_AG</a>                               |
| 0,3     | 714536      | steward B               | <a href="https://www.pixiv.net/en/users/2212889">https://www.pixiv.net/en/users/2212889</a>       |
| 0,4     | 2690308     | aken@お仕事募集中             | <a href="https://www.pixiv.net/en/users/196317">https://www.pixiv.net/en/users/196317</a>         |
| 0,5     | 2260893     | ABBB                    | <a href="https://www.pixiv.net/en/users/4066325">https://www.pixiv.net/en/users/4066325</a>       |
| 1,0     | 3014412     | Disco                   | <a href="https://www.pixiv.net/en/users/14377769">https://www.pixiv.net/en/users/14377769</a>     |
| 1,1     | 2239511     | 千里GAN (改名)              | <a href="https://twitter.com/oshirase_gan">https://twitter.com/oshirase_gan</a>                   |
| 1,2     | 3657552     | 塩soda                   | <a href="https://twitter.com/kurau3">https://twitter.com/kurau3</a>                               |
| 1,3     | 3587211     | せんちゃ                    | <a href="https://www.pixiv.net/en/users/3388329">https://www.pixiv.net/en/users/3388329</a>       |
| 1,4     | 3478391     | ぺろんちょ                   | <a href="https://www.pixiv.net/en/users/2689378">https://www.pixiv.net/en/users/2689378</a>       |
| 1,5     | 2925591     | 米山舞                     | <a href="https://www.pixiv.net/en/users/1554775">https://www.pixiv.net/en/users/1554775</a>       |
| 2,0     | 2444625     | Pack                    | <a href="https://www.pixiv.net/en/users/6069171">https://www.pixiv.net/en/users/6069171</a>       |
| 2,1     | 2772952     | しずまよしのり                 | <a href="https://twitter.com/M_ars">https://twitter.com/M_ars</a>                                 |
| 2,2     | 2847265     | 千羽ミハト (Mihato)          | <a href="https://www.pixiv.net/en/users/485524">https://www.pixiv.net/en/users/485524</a>         |
| 2,3     | 670776      | 芹ざわ_お仕事募集中              | <a href="https://www.pixiv.net/en/users/1156416">https://www.pixiv.net/en/users/1156416</a>       |
| 2,4     | 2559537     | infukun                 | <a href="https://www.pixiv.net/en/users/5065896">https://www.pixiv.net/en/users/5065896</a>       |
| 2,5     | 2655733     | QBASE                   | <a href="https://www.pixiv.net/en/users/246248">https://www.pixiv.net/en/users/246248</a>         |
| 3,0     | 2468752     | アモニット                   | <a href="https://www.pixiv.net/en/users/1621147">https://www.pixiv.net/en/users/1621147</a>       |
| 3,1     | 777932      | ヒエラポリスとバムッカレ            | <a href="https://www.pixiv.net/en/users/873649">https://www.pixiv.net/en/users/873649</a>         |
| 3,2     | 961167      | ヒエラポリスとバムッカレ            | <a href="https://www.pixiv.net/en/users/873649">https://www.pixiv.net/en/users/873649</a>         |
| 3,3     | 2868154     | 菟_                      | <a href="https://www.pixiv.net/en/users/3621731">https://www.pixiv.net/en/users/3621731</a>       |
| 3,4     | 2723355     | 9Ro                     | <a href="https://twitter.com/RINGDDINGDONGX2">https://twitter.com/RINGDDINGDONGX2</a>             |
| 3,5     | 2982683     | dairi                   | <a href="https://www.pixiv.net/en/users/4920496">https://www.pixiv.net/en/users/4920496</a>       |
| 4,0     | 3450286     | さとうぼて                   | <a href="https://twitter.com/mrcosmoov">https://twitter.com/mrcosmoov</a>                         |
| 4,1     | 1376016     | トレス                     | <a href="https://www.pixiv.net/en/users/2056112">https://www.pixiv.net/en/users/2056112</a>       |
| 4,2     | 2968950     | LM7                     | <a href="https://www.pixiv.net/en/users/420928">https://www.pixiv.net/en/users/420928</a>         |
| 4,3     | 3204663     | Cowfee@home             | <a href="https://twitter.com/cowfee_desu">https://twitter.com/cowfee_desu</a>                     |
| 4,4     | 2176604     | ゴールデン@お仕事募集中            | <a href="https://www.pixiv.net/en/users/8607687">https://www.pixiv.net/en/users/8607687</a>       |
| 4,5     | 892947      | mizuki                  | <a href="https://www.pixiv.net/en/users/1050881">https://www.pixiv.net/en/users/1050881</a>       |
| 5,0     | 3561627     | keti                    | <a href="https://www.pixiv.net/en/users/4705322">https://www.pixiv.net/en/users/4705322</a>       |
| 5,1     | 3006738     | ささ吉                     | <a href="https://www.pixiv.net/en/users/7187584">https://www.pixiv.net/en/users/7187584</a>       |
| 5,2     | 2818640     | しろもる                    | <a href="https://www.pixiv.net/en/users/19858643">https://www.pixiv.net/en/users/19858643</a>     |
| 5,3     | 3673940     | Jiujiu girl             | <a href="https://www.pixiv.net/en/users/1221354">https://www.pixiv.net/en/users/1221354</a>       |
| 5,4     | 3566370     | 2 番目のむみん                | <a href="https://www.pixiv.net/en/users/8186490">https://www.pixiv.net/en/users/8186490</a>       |
| 5,5     | 3617376     | まかだみあ                   | <a href="https://www.pixiv.net/en/users/2782928">https://www.pixiv.net/en/users/2782928</a>       |
| 6,0     | 1170740     | 黒星紅白                    | <a href="https://www.pixiv.net/en/users/178217">https://www.pixiv.net/en/users/178217</a>         |
| 6,1     | 2889129     | Anmi@画集発売中              | <a href="https://www.pixiv.net/en/users/212801">https://www.pixiv.net/en/users/212801</a>         |
| 6,2     | 591979      | wk.                     | <a href="https://www.pixiv.net/en/users/142914">https://www.pixiv.net/en/users/142914</a>         |
| 6,3     | 1974764     | katsuragi (osaka8o2)    | <a href="https://danbooru.donmai.us/artists/108387">https://danbooru.donmai.us/artists/108387</a> |
| 6,4     | 3389838     | るっぴ                     | <a href="https://twitter.com/gouya_yu0508">https://twitter.com/gouya_yu0508</a>                   |
| 6,5     | 3357418     | guitaro (yabasaki taro) | <a href="https://danbooru.donmai.us/artists/181484">https://danbooru.donmai.us/artists/181484</a> |

Table 3. Artist attribution for Figure 1 in the supplementary materials.
